# Supplementary material for: Dysregulated gene expression of SUMO machinery components induces the resistance to anti-PD-1 immunotherapy in lung cancer by upregulating the death of peripheral blood lymphocytes
Source: PubMed Central journal article supplement (PMC11357960; doi:10.3389/fimmu.2024.1424393), 2024-08-15
Supplement: Image3.pdf [file Image3.pdf]

### Supplementary Figure 3

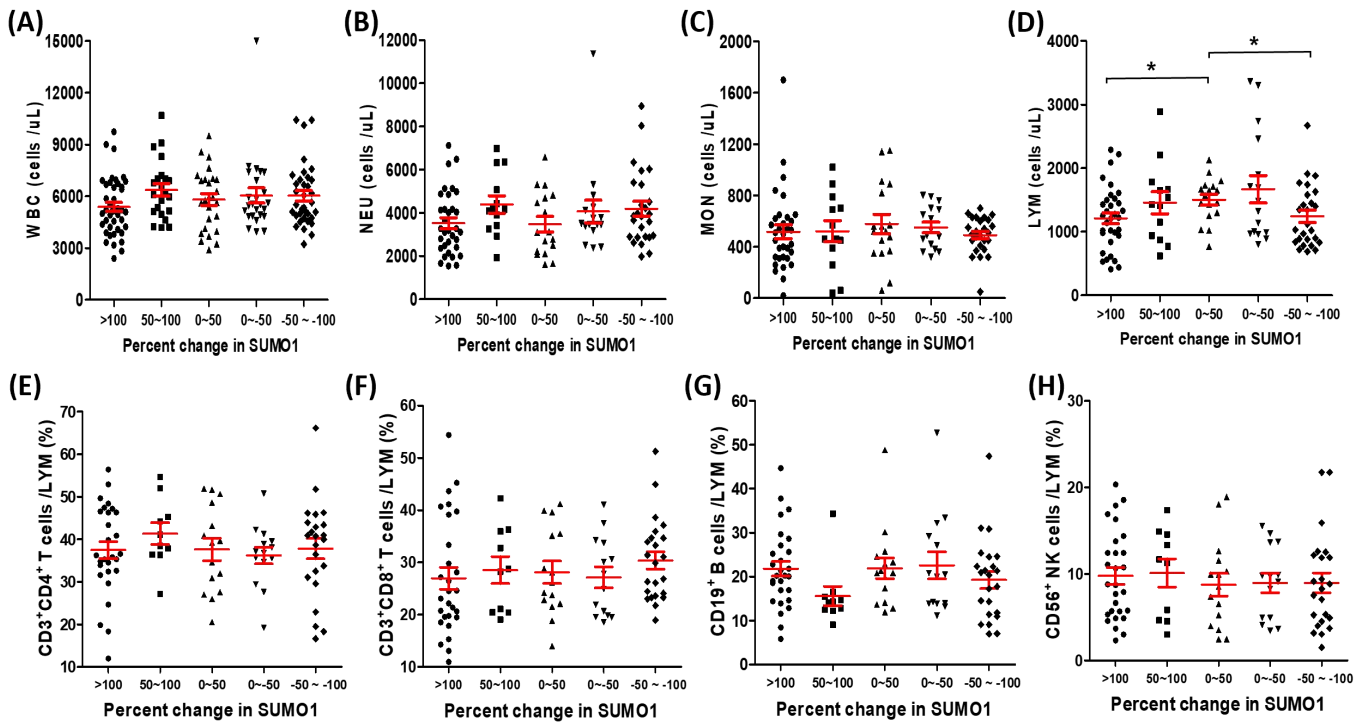

**Supplementary figure 3. Association between the percentage change in *SUMO1* mRNA level and different white blood cell populations in peripheral blood of lung cancer patients. (A-D) The absolute counts of white blood cell (WBC), neutrophils (NEU), monocytes (MON) and lymphocytes (LYM) were compared among different groups based on the percentage change of *SUMO1*. (E-H) The percentages of lymphocyte subsets were compared among different groups based on the percentage change of *SUMO1*. Student's paired t-test, \*  $P < 0.05$ .**
