# Supplementary material for: Dysregulated gene expression of SUMO machinery components induces the resistance to anti-PD-1 immunotherapy in lung cancer by upregulating the death of peripheral blood lymphocytes
Source: PubMed Central journal article supplement (PMC11357960; doi:10.3389/fimmu.2024.1424393), 2024-08-15
Supplement: Table1.pdf [file Table1.pdf]

### Supplementary table 1. Primer sequences for Real-time PCR.

| Serial number | Gene  | Forward                        | Reverse                          |
|---------------|-------|--------------------------------|----------------------------------|
| 1             | GAPDH | 5'- AGAAGGCTGGGGCTCATTTG -3'   | 5'- GTGGTCATGAGTCCTTCCAC -3'     |
| 2             | SUMO1 | 5'- CGAGGTTCTGCTTACCCGAG -3'   | 5'- CCCCCAAGTCCTCAGTTGAA -3'     |
| 3             | SUMO2 | 5'- TTGACGGGCAACCAATCAATG -3'  | 5'- TCAGTAGACACCTCCCGTCT -3'     |
| 4             | SUMO3 | 5'- GAGAGGCAGGGCTTGTC AAT -3'  | 5'- CTAGAAACTGTGCCCTGCCA -3'     |
| 5             | SUMO4 | 5'- CTGCTCGTGTACTCGTTAGGT -3'  | 5'- GACAATCCCCGTGGTTCACA -3'     |
| 6             | SAE1  | 5'- GCACGACCTCCGACTACTTT -3'   | 5'- ACCCAGTGAGTCAAGCACATC -3'    |
| 7             | UBA2  | 5'- ATCAAAGGCACAGGTTGCCA -3'   | 5'- TCTGGGTCGGCTTAGGATGA -3'     |
| 8             | UBE2I | 5'- GAAGTCCCGAGACAAAGGGA -3'   | 5'- CAGCCACGAAACCAAATGGG -3'     |
| 9             | PIAS1 | 5'- AGGTAGTGAGCGGGACGTTA -3'   | 5'- TTTGGTTGTTCTCCATCAGCTACA -3' |
| 10            | PIAS2 | 5'- TGGCGGATTCGAAGAGTTGA -3'   | 5'- GTTCGTGGATATCGGCGTCT -3'     |
| 11            | SEN1  | 5'- CGGTTCCGGTTCGGACTTT -3'    | 5'- TCGCCTGAGCCAAGAAAACT -3'     |
| 12            | SEN2  | 5'- GTGGTGGTTAAGACGGCGAA -3'   | 5'- TGCCGAGAATCCTAACCAGC -3'     |
| 13            | SEN3  | 5'- CCGACCTCTTTTGATGCCT -3'    | 5'- AGTGGAAATGTCAGCGAGGTG -3'    |
| 14            | SEN5  | 5'- TTCTGTTGATTCTATTACCTGG -3' | 5'- CAGTCTGCCAACCTGAAGA -3'      |
| 15            | SEN6  | 5'- GCCCAAAGCAGTCTGGACC -3'    | 5'- GTTCAACACCTTGAGCCGA -3'      |
| 16            | SEN7  | 5'- TTCAGCAGCGGGAGAAGATG -3'   | 5'- CAAAGGAGAGTCCAGCGTT -3'      |
